# Supplementary material for: Extrinsic chirality tailors Stokes parameters in simple asymmetric metasurfaces
Source: Royal Society of Chemistry journal article supplement (doi:10.1039/d3nr06085c), 2024-01-01
Supplement: d3nr06085c1.pdf [file d3nr06085c1.pdf]

## SUPPORTING INFORMATION

### Extrinsic chirality tailors Stokes parameters in simple asymmetric metasurfaces

Emilija Petronijevic,<sup>a,\*</sup> Tiziana Cesca,<sup>b</sup> Carlo Scian,<sup>b</sup> Giovanni Mattei,<sup>b</sup> Roberto Li Voti,<sup>a</sup> Concita Sibilìa<sup>a</sup> and Alessandro Belardini<sup>a</sup>

<sup>a</sup> Department SBAI, Sapienza University of Roma, Via A. Scarpa 14, I-00161 Rome, Italy. E-mail: emilija.petronijevic@uniroma1.it

<sup>b</sup> University of Padova, Department of Physics and Astronomy, NanoStructures Group, via Marzolo 8, I-35131 Padova, Italy.

#### 1. Polarization-resolved chiro-optical spectroscopy

To define the input polarization state, the first linear polarizer (LP) was kept in the horizontal position, and the first quarter-wave plate (QWP) is rotated; QWP angles of  $-45^\circ$ ,  $0^\circ$  and  $+45^\circ$  correspond to LCP, p and RCP polarized light, respectively. The sample was facing the incident light from the metasurface side, and the total intensity was detected by a photo-diode (PD).

To resolve Stokes parameters, a QWP and a LP were put into the transmitted beam path before the PD, and four combinations of their orientations were measured;  $\phi_{\text{QWP}}$  is the QWP fast axis angle w.r.t. vertical axis, while  $\phi_{\text{LP}}$  is the LP angle w.r.t. horizontal axis. In the first three measurement,  $\phi_{\text{QWP}}=0^\circ$ , while the LP acquires angles  $\phi_{\text{LP}}=0^\circ$  (horizontal),  $\phi_{\text{LP}}=45^\circ$  (diagonal) and  $\phi_{\text{LP}}=90^\circ$  (vertical); these three measurements give intensities  $I_1$ ,  $I_2$  and  $I_3$ , respectively. In the fourth measurement,  $I_4$  gives the transmitted intensity for  $\phi_{\text{QWP}}=\phi_{\text{LP}}=45^\circ$ . Finally, Stokes parameters are obtained as:  $S_0 = I_1 + I_3$ ,  $S_1 = I_1 - I_3$ ,  $S_2 = S_0 - 2I_4$ ,  $S_3 = 2I_2 - S_0$ . Parameters  $S_1$ ,  $S_2$  and  $S_3$  in the main manuscript are obtained by normalizing parameters  $S_1$ ,  $S_2$  and  $S_3$  by  $S_0$ .

#### 2. Numerical modelling of asymmetric metasurfaces

We performed extensive numerical simulations by means of a commercial-grade numerical package in Lumerical, Ansys. Lumerical solves Maxwell's equations by 3D Finite Difference Time Domain (FDTD) method on a discrete spatial and temporal grid. The simulation domain is defined by a unit cell with Bloch boundary conditions in x- and y- directions, and perfectly matching layers in the z-direction, see Fig. 1c in the main manuscript. The xy plane spans  $a\sqrt{3}$  and  $a$  in the x- and y-direction, respectively, where  $a = 522\text{nm}$  is given by the initial nanosphere diameter in nanosphere lithography. The metasurface consists of polystyrene nanosphere with diameter of 370 nm, covered by a 50 nm thick golden asymmetric shell, and standing on a semi-infinite glass substrate (see Fig. 1b in the main manuscript). To account for the low in-plane chirality, the shell is tilted around the vertical axis for angle  $30^\circ$  with respect to the y-direction. The metasurface is excited from the top (air) side, with a broadband plane-wave source. Since we investigate oblique incidence up to  $40^\circ$ , a special care is needed to remove the wavelength dependence on the injection angle: a Broadband Fixed Angle Source Technique (BFAST). Therefore, two BFAST sources with properly shifted phases model circular polarizations, while one BFAST source models linear p polarization. The incidence plane is defined as in the experiment; note that under normal incidence, linearly polarized source has electric field oscillating perpendicular to the in-plane asymmetry vector  $\vec{S}$ . The FDTD region is meshed with accuracy of 4. The absorption per unit volume is calculated by measuring both electric field and complex refractive index in the "pabs\_adv" analysis group. The best fit of the model was done by comparing the zeroth order of the simulated transmitted field in a broad spectral and incidence angle range to the experimental results (Fig. 2 of the main manuscript). This model was then applied to study the absorption (Fig. 3 of the main manuscript, and Fig. S1), and the electric field vector of the transmitted beam (Fig. S2).

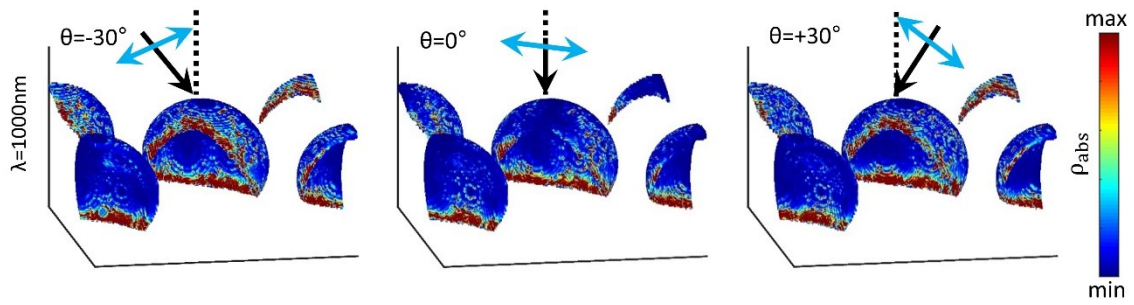

**Figure S1** Absorption density distribution for p-polarized excitation at 1000 nm, at  $\pm 30^\circ$  and normal incidence.

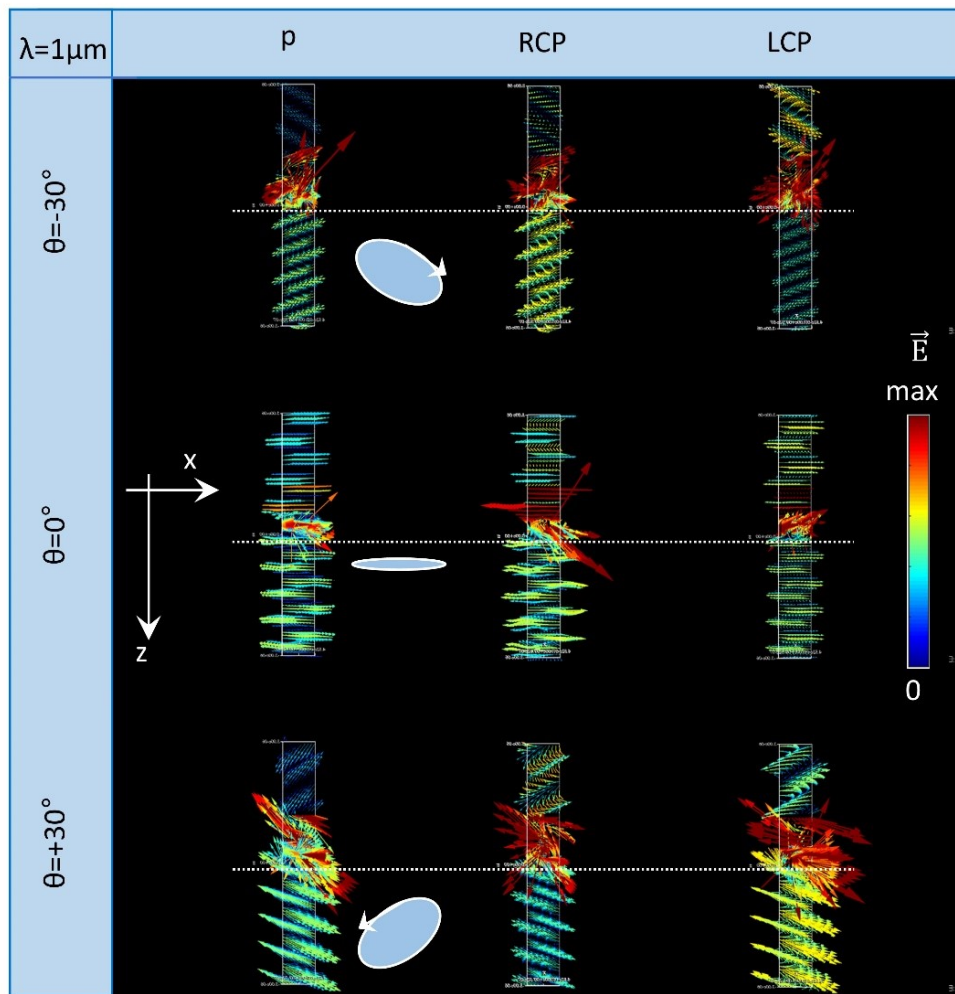

**Figure S2** Electric field vector behaviour in the  $xz$  plane, excited at wavelength of  $1 \mu\text{m}$ , with p, LCP or RCP polarization, under normal incidence or  $\theta = \pm 30^\circ$ . The  $xz$  monitor shows propagation from  $+3 \mu\text{m}$  to  $-3 \mu\text{m}$ , and the white dashed lines represent glass substrate. As in the experiment, the field is incident from the top (negative  $z$ -direction) and it is strongly enhanced in the near-field around the metasurface. Sketches for p-polarized excitation correspond to the experimentally measured handedness of the elliptically polarized transmitted beam.
